# Supplementary figures and images for: A Comprehensive Functional Map of the Hepatitis C Virus Genome Provides a Resource for Probing Viral Proteins
Source: PubMed Central journal article supplement — mBio. 2014 Sep 30;5(5):e01469-14. doi: 10.1128/mBio.01469-14 (PMC4196222; doi:10.1128/mbio.01469-14), 2014-09-30

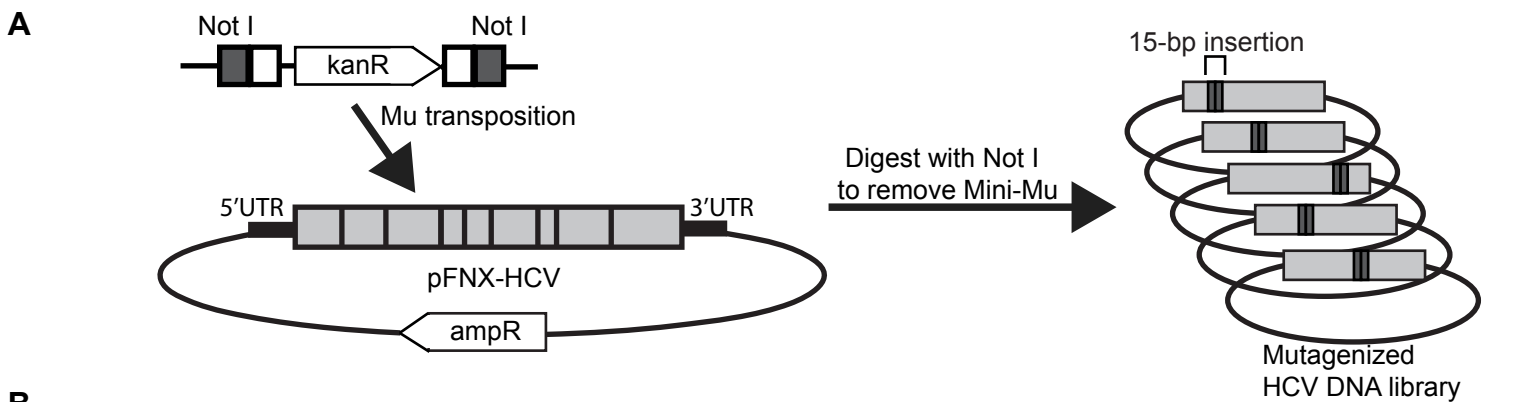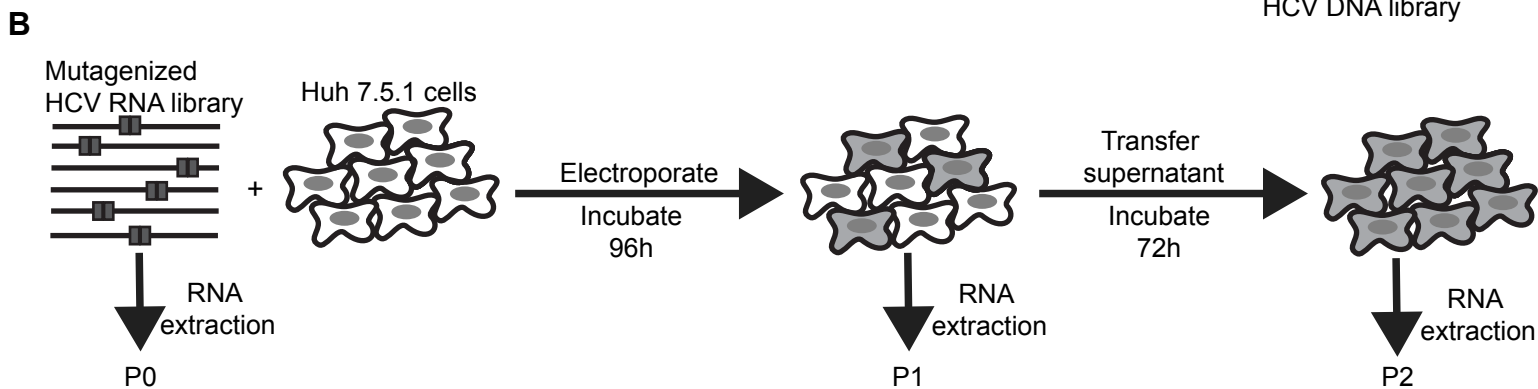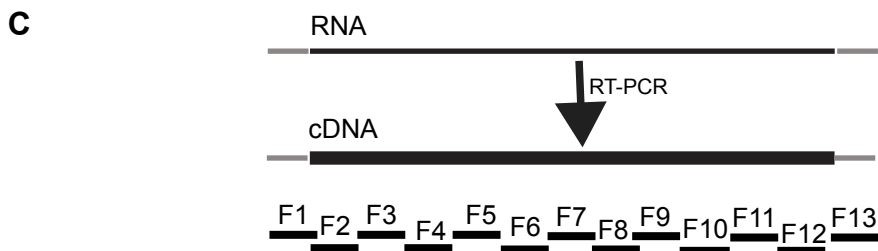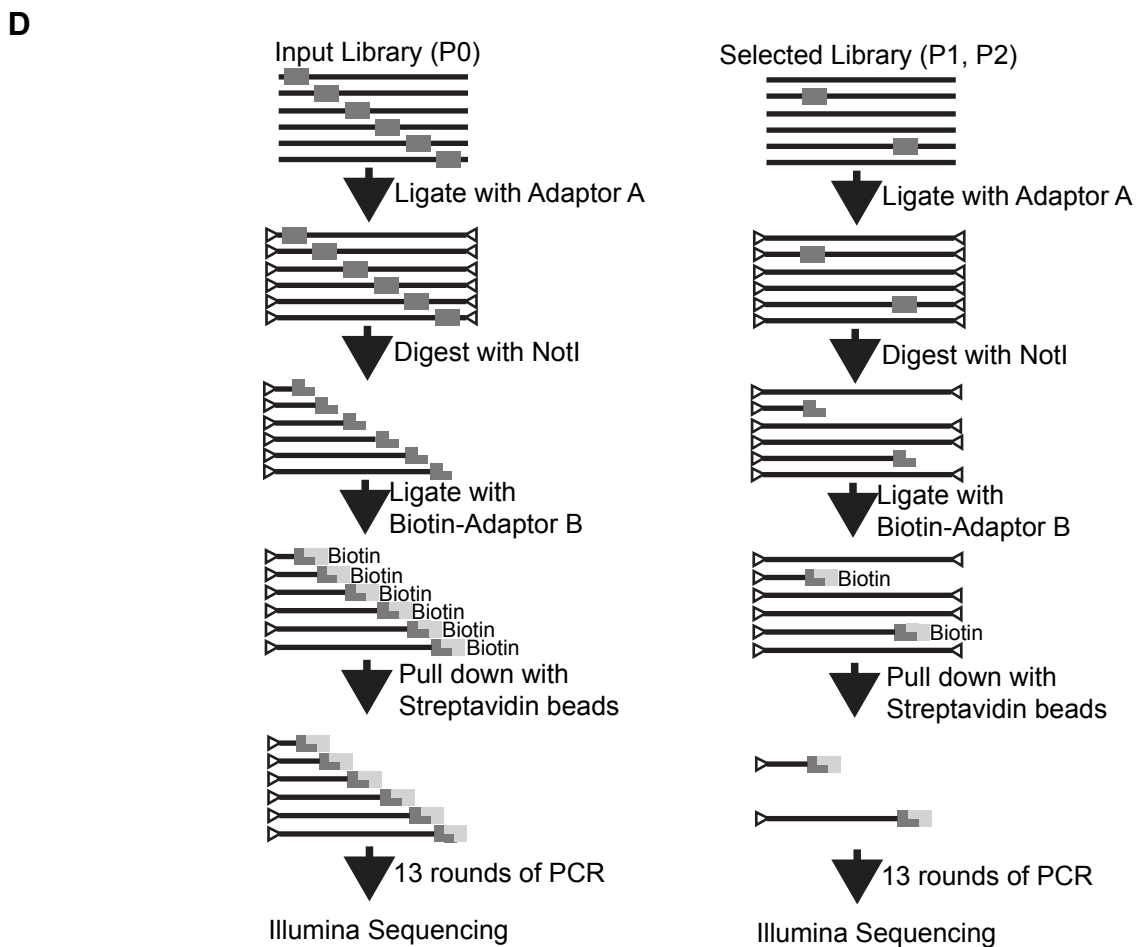

Supplement: mbo005142011sf1.pdf [file mbo005142011sf1.pdf]

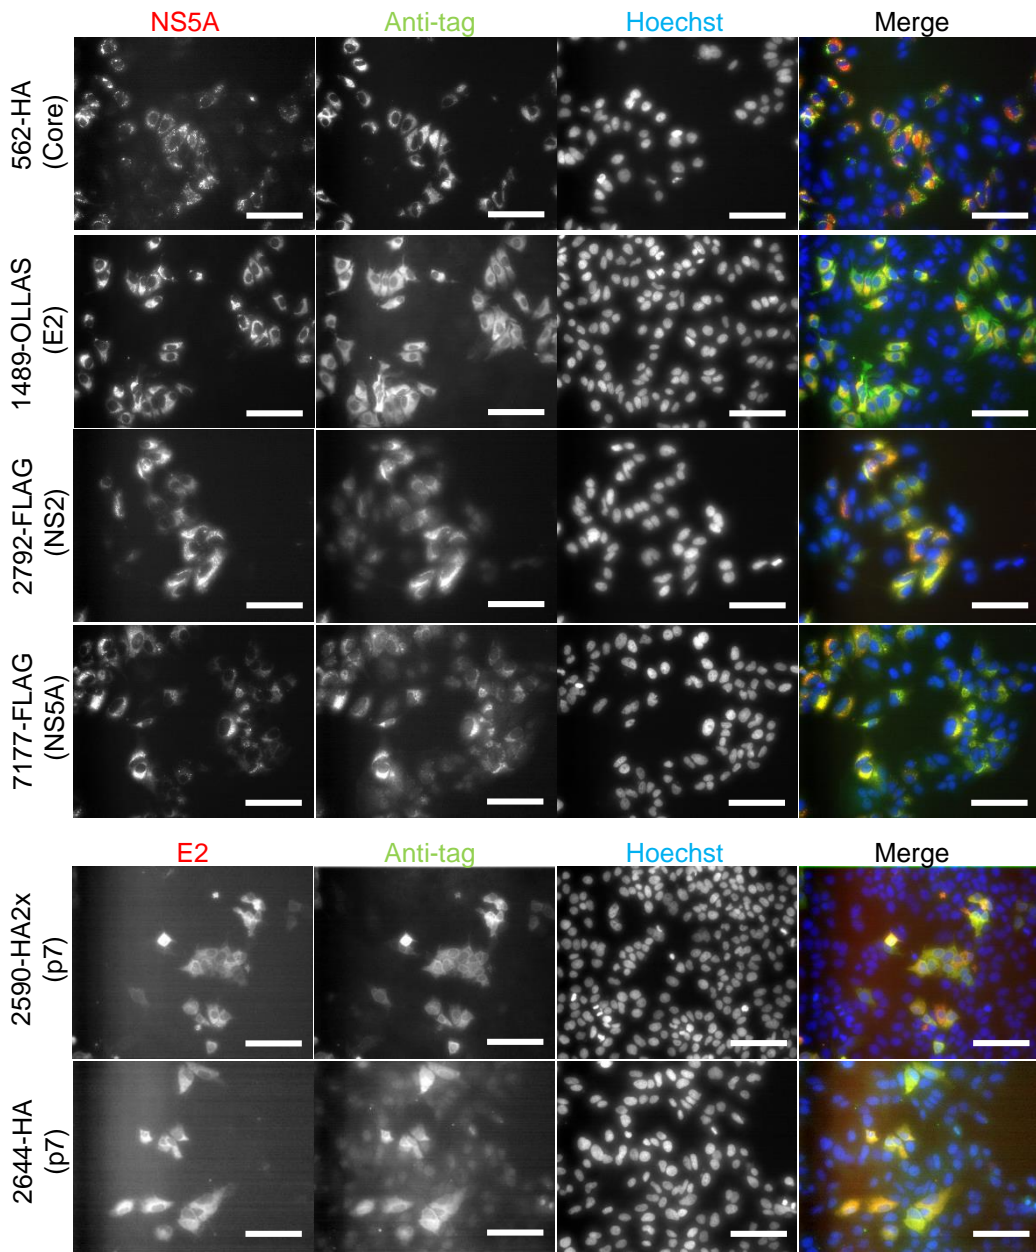

Supplement: mbo005142011sf3.pdf [file mbo005142011sf3.pdf]
